# Supplementary material
Source: Springer Nature journal article supplement (https://www.springermedizin.de/resource/supplementary/12967_2010_461_MOESM3_ESM.pdf/9576590)

**A**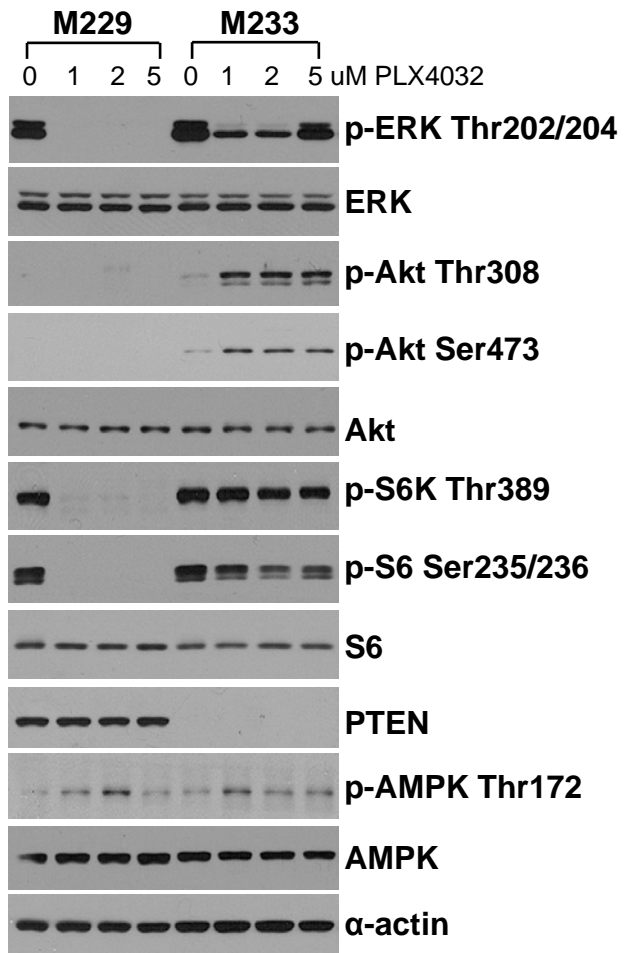**B**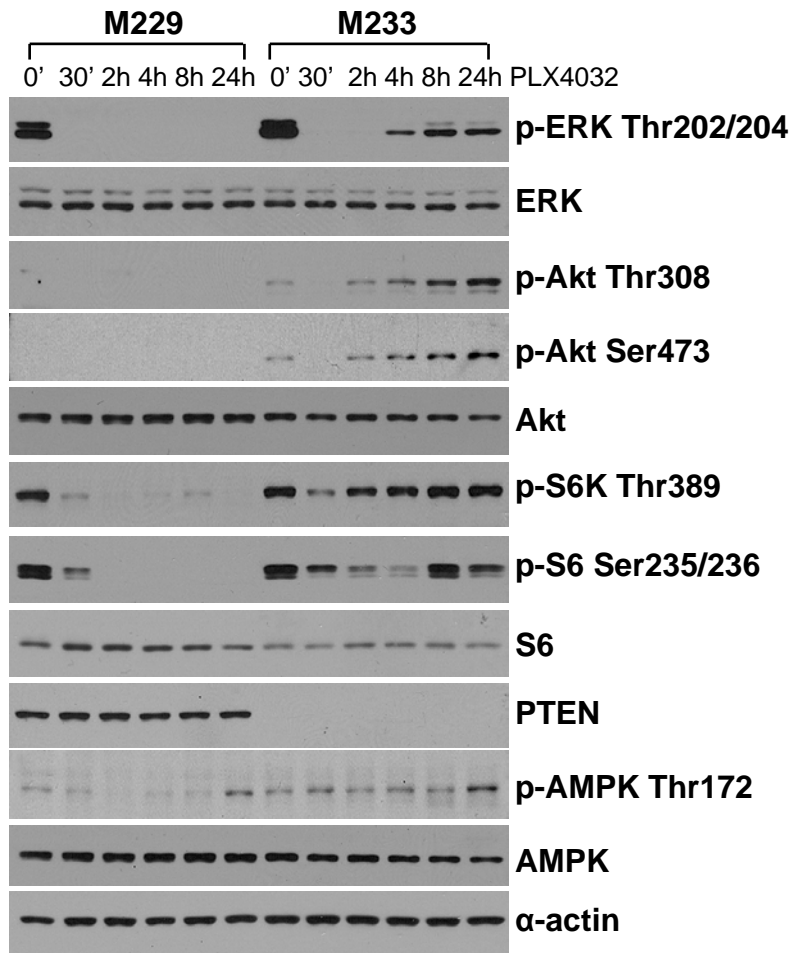

Supplement: MOESM3 [file 9576590]
